# Supplementary material
Source: PubMed Central journal article supplement (PMC137479)
Supplement: pnas_222551899_9.pdf [file pnas_222551899_9.pdf]

A. CoomassieBlue Gel

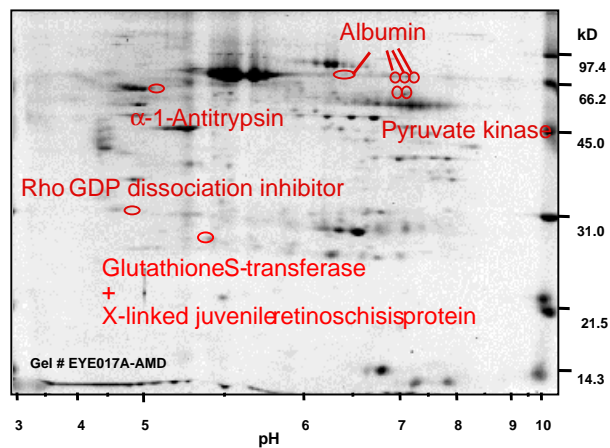

B. Anti-CEP Western

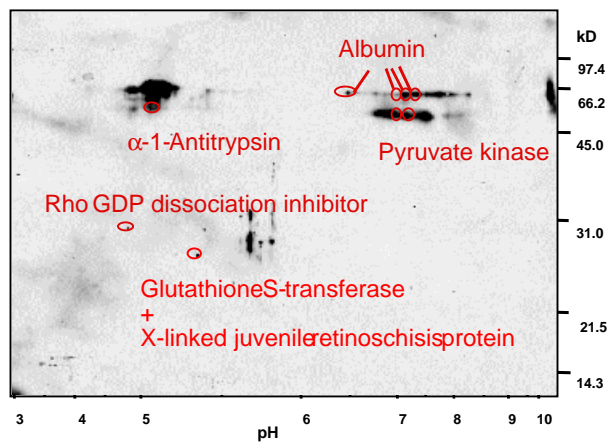

| Protein                                 | Peptide Matches | Sequence Coverage | On Gel |     | Theoretical |      |
|-----------------------------------------|-----------------|-------------------|--------|-----|-------------|------|
|                                         |                 |                   | MW     | pI  | MW          | pI   |
| alpha-1-Antitrypsin                     | 8/16            | 33%               | 70 kD  | 5.1 | 46736       | 5.40 |
| Albumin                                 | 10/16           | 15%               | 80     | 6.7 | 66472       | 5.67 |
| Pyruvate kinase, M1 or M2               | 6/13            | 18%               | 70     | 7.0 | 57746       | 7.57 |
| Pyruvate kinase, M1 or M2               | 8/29            | 22%               | 70     | 7.0 | 57746       | 7.57 |
| Rho GDP dissociation inhibitor          | 5/16            | 33%               | 31     | 5.0 | 23207       | 5.03 |
| Glutathione S-transferase               | 5/18            | 41%               | 27     | 5.4 | 23382       | 5.43 |
| X-linked juvenile retinoschisis protein | 4/18            | 26%               | 27     | 5.4 | 23038       | 5.47 |
